# Supplementary material for: Palmitate-induced lipotoxicity alters acetylation of multiple proteins in clonal β cells and human pancreatic islets
Source: PubMed Central journal article supplement (PMC5647430; doi:10.1038/s41598-017-13908-w), 2017-10-18
Supplement: 41598_2017_13908_MOESM1_ESM.pdf [file 41598_2017_13908_MOESM1_ESM.pdf]

**Palmitate-induced lipotoxicity alters acetylation of multiple proteins in clonal  $\beta$  cells and human pancreatic islets.**

Federica Ciregia, Marco Bugliani, Maurizio Ronci, Laura Giusti, Claudia Boldrini, Maria R

Mazzoni, Sandra Mossuto, Francesca Grano, Miriam Cnop, Lorella Marselli, Gino Giannaccini,

Andrea Urbani, Antonio Lucacchini, Piero Marchetti.

**Supplementary Table S1. Mitochondria from INS-1E cells.** List of proteins which were identified by immune-captured peptides: control.

| prot_accession | prot_description                                              | prot_score | prot_mass | pept_variable modifications |
|----------------|---------------------------------------------------------------|------------|-----------|-----------------------------|
| RS15A_RAT      | 40S ribosomal protein S15a                                    | 18         | 14944     |                             |
| CH60_RAT       | 60 kDa heat shock protein                                     | 19         | 61088     |                             |
| RLA2_RAT       | 60S acidic ribosomal protein P2                               | 20         | 11685     |                             |
| ADT1_RAT       | ADP/ATP translocase 1                                         | 31         | 33196     | Acetyl (N-term)             |
| ATPA_RAT       | ATP synthase subunit alpha                                    | 33         | 59831     |                             |
| ATPB_RAT       | ATP synthase subunit beta                                     | 25         | 56318     |                             |
| H31_RAT        | Histone H3.1                                                  | 23         | 15509     | 2 Acetyl (K)                |
| H4_RAT         | Histone H4                                                    | 46         | 11360     | 2 Acetyl (K)                |
| INS2_RAT       | Insulin-2                                                     | 25         | 12673     |                             |
| MYH9_RAT       | Myosin-9                                                      | 38         | 227566    | Acetyl (K)                  |
| NDUAA_RAT      | NADH dehydrogenase [ubiquinone] 1 alpha subcomplex subunit 10 | 20         | 40753     |                             |
| PDIA3_RAT      | Protein disulfide-isomerase A3                                | 43         | 57044     |                             |
| TBA1B_RAT      | Tubulin alpha-1B chain                                        | 27         | 50804     |                             |
| TBB2A_RAT      | Tubulin beta-2A chain                                         | 49         | 50274     |                             |
| UGGG1_RAT      | UDP-glucose:glycoprotein                                      | 25         | 177061    |                             |

**Supplementary Table S2. Mitochondria from INS-1E cells.** List of proteins which were identified by immune-captured peptides: palmitate.

| prot_accession | prot_description                                                    | prot_score | prot_mass | pept_variable modifications |
|----------------|---------------------------------------------------------------------|------------|-----------|-----------------------------|
| RM22_RAT       | 39S ribosomal protein L22                                           | 18         | 24252     | 2 Acetyl (K)                |
| 4F2_RAT        | 4F2 cell-surface antigen heavy chain                                | 27         | 58150     | 3 Acetyl (K)                |
| CH60_RAT       | 60 kDa heat shock protein                                           | 82         | 61088     |                             |
| GRP78_RAT      | 78 kDa glucose-regulated protein                                    | 127        | 72473     |                             |
| ACTA_RAT       | Actin, aortic smooth muscle                                         | 217        | 42381     |                             |
| ACTG_RAT       | Actin, cytoplasmic 2                                                | 267        | 42108     |                             |
| ADT1_RAT       | ADP/ATP translocase 1                                               | 145        | 33196     | Acetyl (K)                  |
| ADT2_RAT       | ADP/ATP translocase 2                                               | 141        | 33108     |                             |
| ATPA_RAT       | ATP synthase subunit alpha                                          | 461        | 59831     |                             |
| ATPB_RAT       | ATP synthase subunit beta                                           | 361        | 56318     |                             |
| ATP5I_RAT      | ATP synthase subunit e                                              | 33         | 8249      |                             |
| CISY_RAT       | Citrate synthase                                                    | 37         | 52176     |                             |
| CLH1_RAT       | Clathrin heavy chain 1                                              | 34         | 193187    |                             |
| COX5A_RAT      | Cytochrome c oxidase subunit 5A                                     | 25         | 16347     |                             |
| EF1A1_RAT      | Elongation factor 1-alpha 1                                         | 60         | 50424     |                             |
| ENPL_RAT       | Endoplasmic reticulum protein                                       | 125        | 92998     |                             |
| G3P_RAT        | Glyceraldehyde-3-phosphate dehydrogenase                            | 28         | 36090     | 2 Acetyl (K)                |
| GNAS1_RAT      | Guanine nucleotide-binding protein G(s) subunit alpha isoforms XLas | 45         | 123836    |                             |
| HS71L_RAT      | Heat shock 70 kDa protein 1-like                                    | 31         | 70904     |                             |
| H2A2A_RAT      | Histone H2A type 2-A                                                | 77         | 14087     |                             |
| H2B1_RAT       | Histone H2B type 1                                                  | 35         | 13982     |                             |
| HCDH_RAT       | Hydroxyacyl-coenzyme A dehydrogenase                                | 51         | 34540     |                             |
| INS2_RAT       | Insulin-2                                                           | 17         | 12673     |                             |
| LPPRC_RAT      | Leucine-rich PPR motif-containing protein                           | 65         | 157808    |                             |
| LRC4B_RAT      | Leucine-rich repeat-containing protein 4B                           | 16         | 76983     |                             |
| MDHM_RAT       | Malate dehydrogenase                                                | 71         | 36117     |                             |
| M2OM_RAT       | Mitochondrial 2-oxoglutarate/malate carrier protein                 | 28         | 34393     | Acetyl (K)                  |
| MYH9_RAT       | Myosin-9                                                            | 34         | 227566    | 3 Acetyl (K)                |
| NDUS1_RAT      | NADH-ubiquinone oxidoreductase 75 kDa subunit                       | 20         | 80331     |                             |
| PPID_RAT       | Peptidyl-prolyl cis-trans isomerase D                               | 17         | 41139     |                             |
| PHB_RAT        | Prohibitin                                                          | 28         | 29859     |                             |
| PDIA3_RAT      | Protein disulfide-isomerase A3                                      | 40         | 57044     |                             |
| S61A1_RAT      | Protein transport protein Sec61 subunit alpha isoform 1             | 27         | 52687     |                             |
| RAB8A_RAT      | Ras-related protein Rab-8A                                          | 38         | 23824     | Acetyl (K)                  |
| AT2A1_RAT      | Sarcoplasmic/endoplasmic reticulum calcium ATPase 1                 | 20         | 110707    |                             |
| AT2A2_RAT      | Sarcoplasmic/endoplasmic reticulum calcium ATPase 2                 | 27         | 116347    |                             |

|           |                                                     |    |        |              |
|-----------|-----------------------------------------------------|----|--------|--------------|
| AT2A3_RAT | Sarcoplasmic/endoplasmic reticulum calcium ATPase 3 | 22 | 117749 |              |
| SRBP1_RAT | Sterol regulatory element-binding protein 1         | 24 | 121472 | Acetyl (K)   |
| GRP75_RAT | Stress-70 protein                                   | 68 | 74097  |              |
| TMM97_RAT | Transmembrane protein 97                            | 21 | 21103  |              |
| ECHA_RAT  | Trifunctional enzyme subunit alpha                  | 18 | 83297  |              |
| NSF_RAT   | Vesicle-fusing ATPase                               | 16 | 83170  |              |
| VDAC1_RAT | Voltage-dependent anion-selective channel protein 1 | 64 | 30851  |              |
| VPP1_RAT  | V-type proton ATPase 116 kDa subunit a isoform 1    | 18 | 97063  | 2 Acetyl (K) |

---

### Supplementary Figure 1. Insulin release from from INS1-E $\beta$ .

Insulin release (expressed as % of insulin content) from INS1-E  $\beta$  cells exposed for 6h (panel a), 14h (panel b) or 24h (panel c) to 0.5 mM palmitate; the effects of deacetylase inhibition are shown in panel d. Data are presented as mean  $\pm$  SD. \* $p$ <0.05 vs LG; # $p$ <0.05 vs LG Ctrl; § $p$ <0.05 vs HG Ctrl.

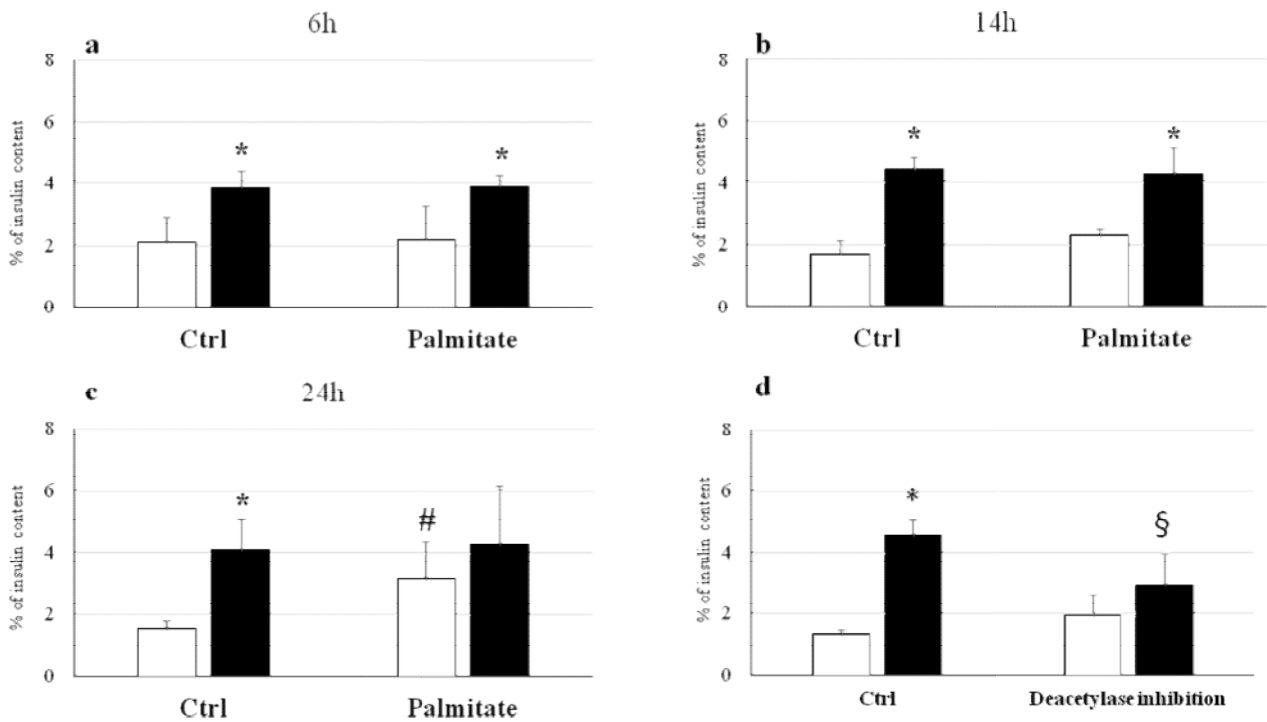

- 2.5 mM glucose (LG)
- 16.7 mM glucose (HG)
